# Supplementary material for: Modification of magnetic molybdenum disulfide by chitosan/carboxymethylcellulose with enhanced dispersibility for targeted photothermal-/chemotherapy of cancer
Source: Royal Society of Chemistry journal article supplement (doi:10.1039/d0tb01664k), 2021-01-01
Supplement: d0tb01664k1.pdf [file d0tb01664k1.pdf]

## **Supporting information**

### **Modification of Magnetic Molybdenum Disulfide by Chitosan/Carboxymethylcellulose with Enhanced dispersibility for Targeted photothermal-/chemotherapy of Cancer**

Meng Xie\*, Jiaqian Li, Tongtong Deng, Na Yang, Mei Yang

School of Pharmacy, Jiangsu University, 212013, China

Corresponding author E-mail addresses: xiemeng@ujs.edu.cn

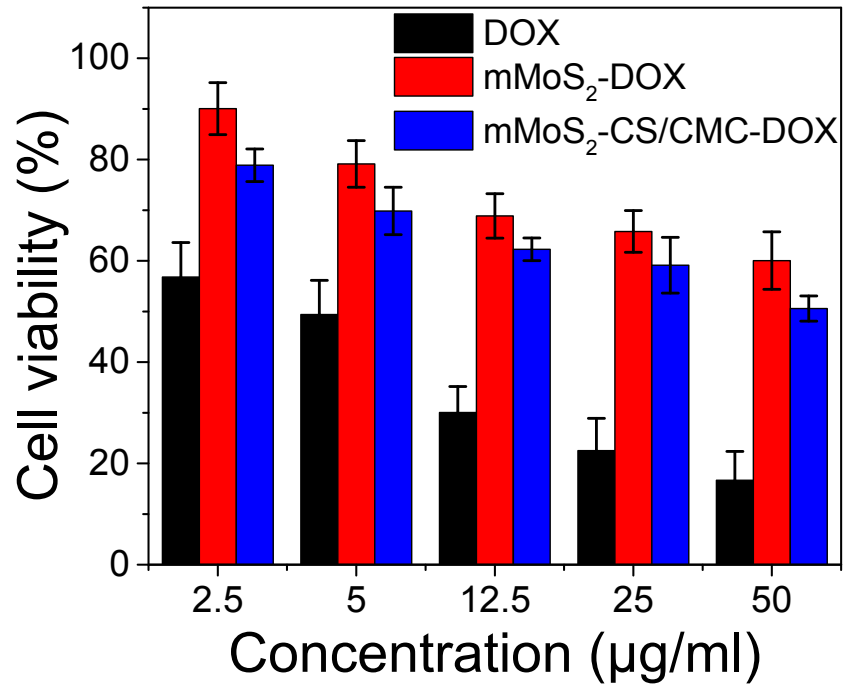

Fig. S1 Cell viability of DOX and DOX loaded samples after the incubation with MDA-MB-231 cells for 24 h.

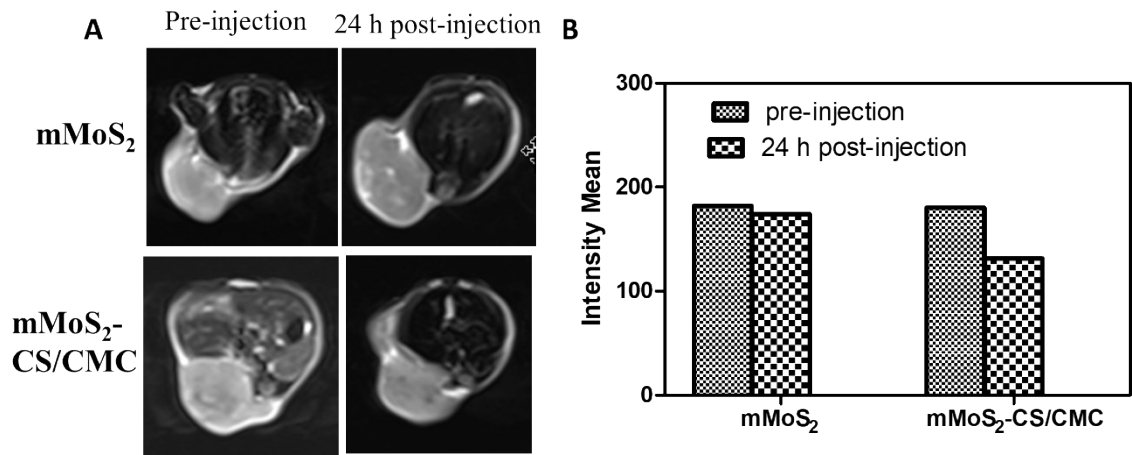

Fig. S2 In vivo T<sub>2</sub>-weighted magnetic resonance images of tumors (A) and signal intensity of mice tumors (B) pre-injection and 24 h post-injection of mMoS<sub>2</sub> and mMoS<sub>2</sub>-CS/CMC.
